# Supplementary material
Source: Research Square preprint supplement (doi:10.21203/rs.3.rs-9740117/v1)
Supplement: Supplementary file 1 [file 5f2d33f1f3a79bac30445b35.docx]

**Highlights**

DBD-cleaned ZnO promotes ·OH-driven SMX coupling and humification.

DBD-nitrated g-C₃N₄ drives ·O₂⁻/h⁺ ring opening and mineralization.

ZnO/g-C₃N₄ couples ·OH cleavage with ·O₂⁻-driven mineralization.
