# Supplementary material
Source: Research Square preprint supplement (doi:10.21203/rs.3.rs-9740117/v1)
Supplement: Supplementary file 3 [file c48d5fb01b5a64d8a0786680.docx]

**Supplementary Information**

The statistical significance and adequacy of the established quadratic models for SMX degradation in the ZnO/DBD and g-C₃N₄/DBD systems were evaluated by analysis of variance (ANOVA). The detailed ANOVA results are summarized in Table S 1. The fitted regression equations and response surface plots are provided in the main text as Eqs. (2) and (3) and Fig. 3, respectively.

Table S 1. Analysis of variance (ANOVA) for the established quadratic models.

| **Source** | **ZnO/DBD system** | | | **g-C₃N₄/DBD system** | | |
| --- | --- | --- | --- | --- | --- | --- |
|  | **Sum of squares** | **F-value** | **p-value** | **Sum of squares** | **F-value** | **p-value** |
| Model | 850.75 | 125.67 | **< 0.0001** | 920.41 | 158.92 | **< 0.0001** |
| X₁-Ureg | 61.34 | 45.23 | **0.0002** | 55.87 | 38.76 | **0.0003** |
| X₂-Dosage | 43.52 | 32.11 | **0.0005** | 75.44 | 52.34 | **< 0.0001** |
| X₃-Time | 120.21 | 88.67 | **< 0.0001** | 151.78 | 105.23 | **< 0.0001** |
| X₁² | 38.57 | 28.45 | **0.0008** | 28.65 | 19.87 | **0.0021** |
| X₂² | 70.98 | 52.34 | **< 0.0001** | 128.51 | 89.12 | **< 0.0001** |
| X₃² | 16.73 | 12.34 | **0.0076** | 12.63 | 8.76 | **0.0154** |
| X₁X₂ | 4.35 | 3.21 | 0.1052 | 1.77 | 1.23 | 0.2987 |
| X₁X₃ | 2.56 | 1.89 | 0.2014 | 6.58 | 4.56 | 0.0632 |
| X₂X₃ | 25.02 | 18.45 | **0.0392** | 4.97 | 3.45 | 0.0954 |
| Residual | 12.23 |  |  | 14.47 |  |  |
| Lack of fit | 7.89 | 2.34 | 0.1876 | 8.12 | 1.89 | 0.2456 |
| Pure error | 4.34 |  |  | 6.35 |  |  |
| R² | 0.9912 |  |  | 0.9934 |  |  |
| Adj. R² | 0.9841 |  |  | 0.9878 |  |  |

The transformation products formed during SMX degradation in the ZnO/DBD and g-C₃N₄/DBD systems were tentatively assigned based on accurate mass information, molecular formula prediction, and comparison with reported SMX transformation pathways. The assignments were used to support the degradation pathways proposed in Fig. 5 of the main text.

Table S 2.Tentatively assigned transformation products during SMX degradation in the ZnO/DBD and g-C₃N₄/DBD systems.

| **Product** | **System** | **[M+H]⁺(m/z)** | **Molecular Formula** | **Proposed Structure** |
| --- | --- | --- | --- | --- |
| P1 | ZnO/DBD | 163 | C₆H₆NO₂S⁺ | 4-Aminobenzenesulfonyl cation |
| P2 | ZnO/DBD | 195 | C₈H₉N₃OS⁺ | Benzenesulfonamide-isoxazole adduct (sulfoxide) |
| P3 | ZnO/DBD | 217 | C₈H₉N₃O₂S⁺ | Benzenesulfonamide-isoxazole adduct (sulfone) |
| P4 | ZnO/DBD | 271 | C₁₀H₁₃N₃O₅S⁺ | Quinoid SMX |
| P5 | ZnO/DBD | 239 | C₁₀H₁₃N₃O₄S⁺ | Monohydroxylated SMX |
| P6 | ZnO/DBD | 319 | C₁₄H₁₁N₃O₄S⁺ | C–C coupled dimer |
| P7 | ZnO/DBD | 373 | C₁₆H₁₂N₄O₅S⁺ | Dimer with carboxyl group |
| P8 | ZnO/DBD | 411 | C₁₈H₁₇N₃O₆S⁺ | C–O bridged dimer |
| P9 | ZnO/DBD | 444 | C₂₀H₂₀N₄O₇S⁺ | Trimer |
| P10 | ZnO/DBD | 489 | C₂₁H₁₅N₅O₈S⁺ | Oxidized trimer |
| P11 | ZnO/DBD | 572 | C₂₄H₂₁N₅O₁₀S₂⁺ | Polymer with two sulfonyl groups |
| P12 | ZnO/DBD | 714 | C₃₀H₂₈N₆O₁₂S₂⁺ | Tetramer |
| P13 | g-C₃N₄/DBD | 168 | C₈H₉N₃O₂⁺ | 3-Acetamido-5-methylisoxazole derivative |
| P14 | g-C₃N₄/DBD | 196 | C₉H₁₃N₃O₂⁺ | Methylated isoxazole derivative |
| P15 | g-C₃N₄/DBD | 272 | C₁₀H₁₃N₃O₄S⁺ | Monohydroxylated SMX |
| P16 | g-C₃N₄/DBD | 288 | C₁₀H₁₃N₃O₅S⁺ | Quinoid SMX |
| P17 | g-C₃N₄/DBD | 108 | C₆H₅NO⁺ | 4-Aminophenol |
| P18 | g-C₃N₄/DBD | 138 | C₆H₇N₃O⁺ | 2-Amino-3-hydroxypyridine |
| P19 | g-C₃N₄/DBD | 136 | C₈H₁₀NO⁺ | 4-Ethylaminophenol |
| P20 | g-C₃N₄/DBD | 345 | C₁₂H₁₆N₄O₆S⁺ | Muconic acid-type derivative |
| P21 | g-C₃N₄/DBD | 395 | C₁₄H₁₀N₄O₈S⁺ | Highly oxidized open-chain product |
| P22 | g-C₃N₄/DBD | 468 | C₁₈H₂₁N₅O₈S⁺ | Open-chain intermediate |
| P23 | g-C₃N₄/DBD | 467 | C₁₈H₂₃N₅O₉S⁺ | Further oxidized open-chain intermediate |
| P24 | g-C₃N₄/DBD | 61 | CH₃NO₂⁺ | Nitromethane |
| P25 | g-C₃N₄/DBD | 69 | C₄H₅O⁺ | Protonated furan |
| P26 | g-C₃N₄/DBD | 87 | C₄H₁₁NO⁺ | 2-Aminobutanol |
