# Supplementary material
Source: Research Square preprint supplement (doi:10.21203/rs.3.rs-9740117/v1)

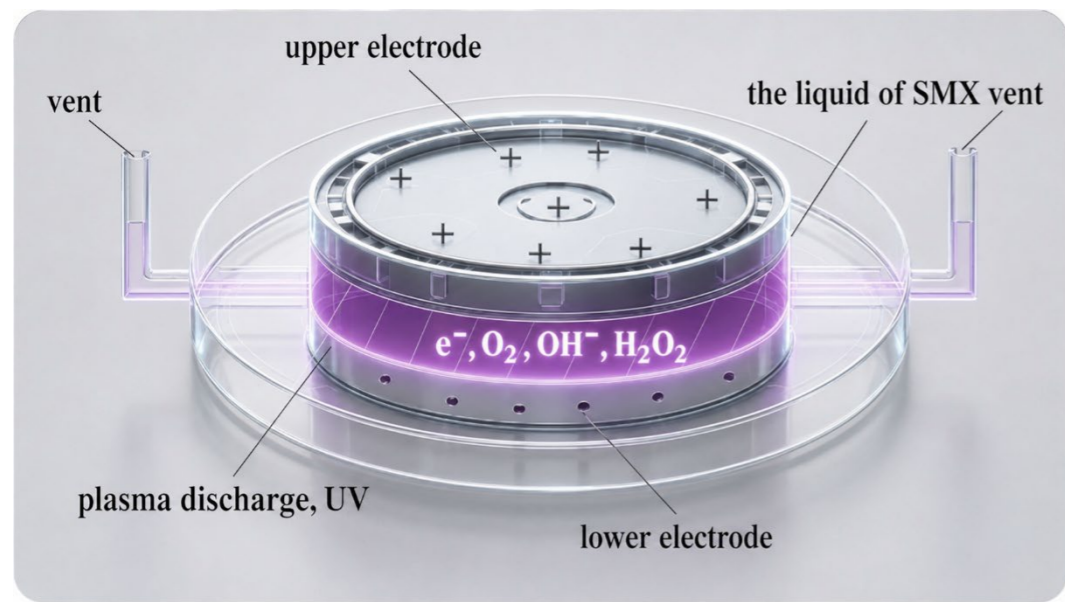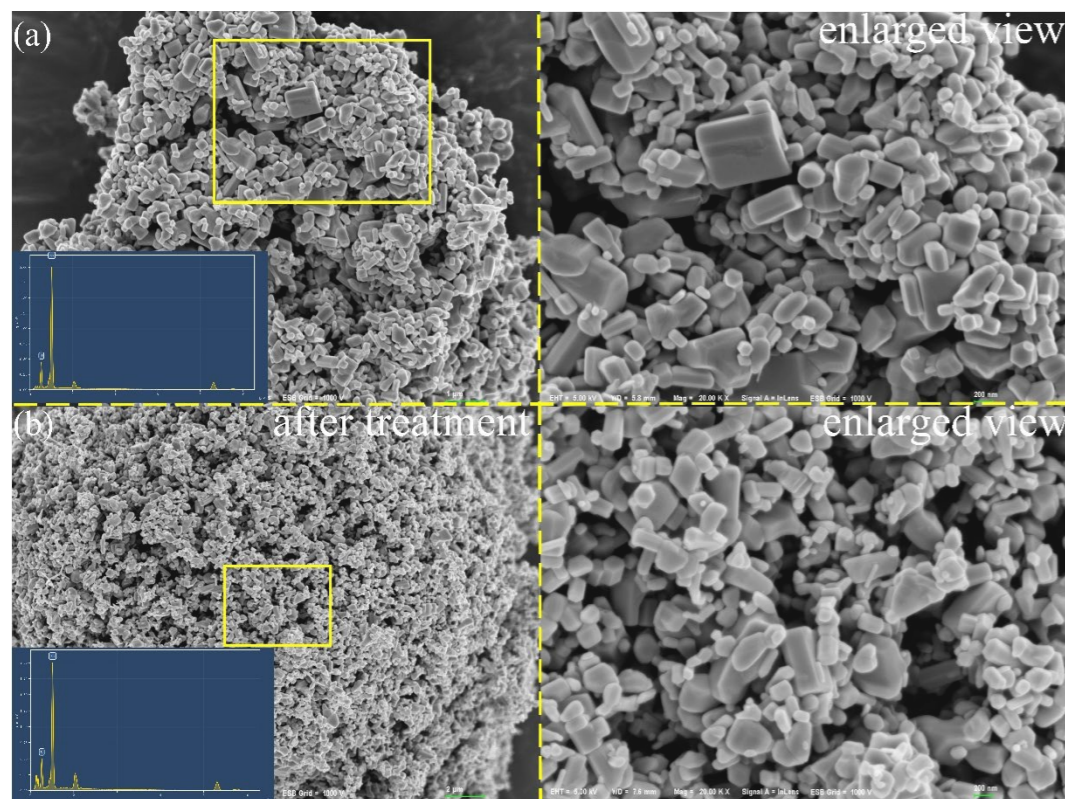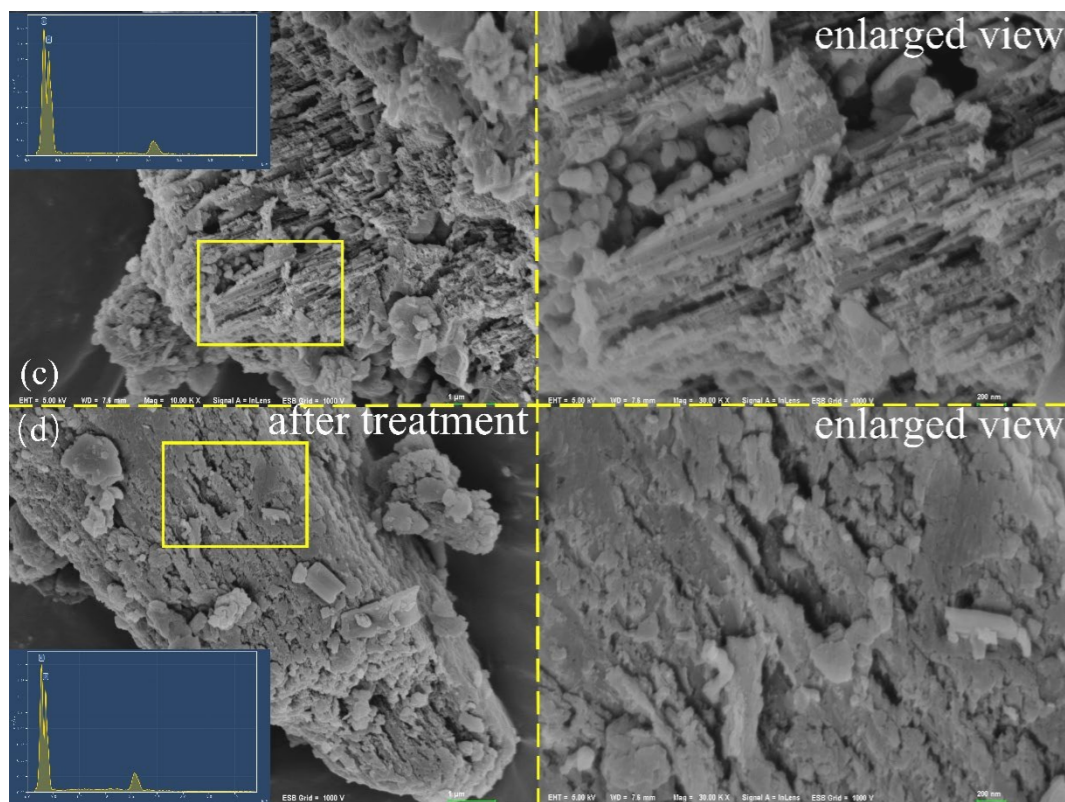

## ZnO/DBD

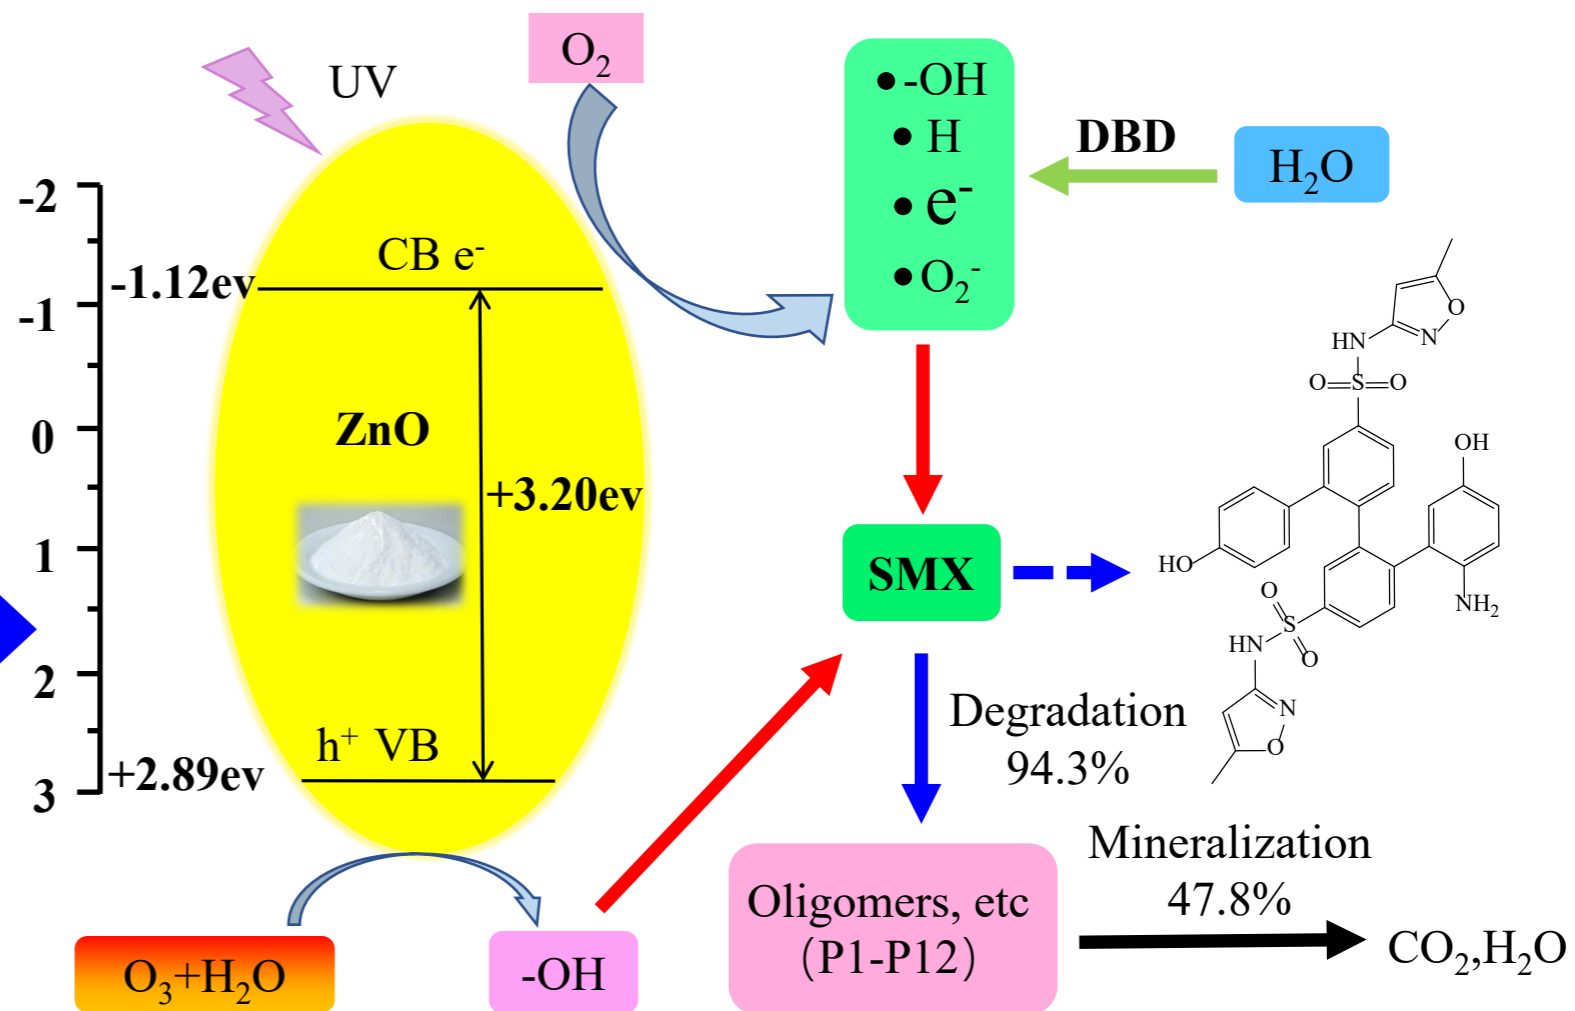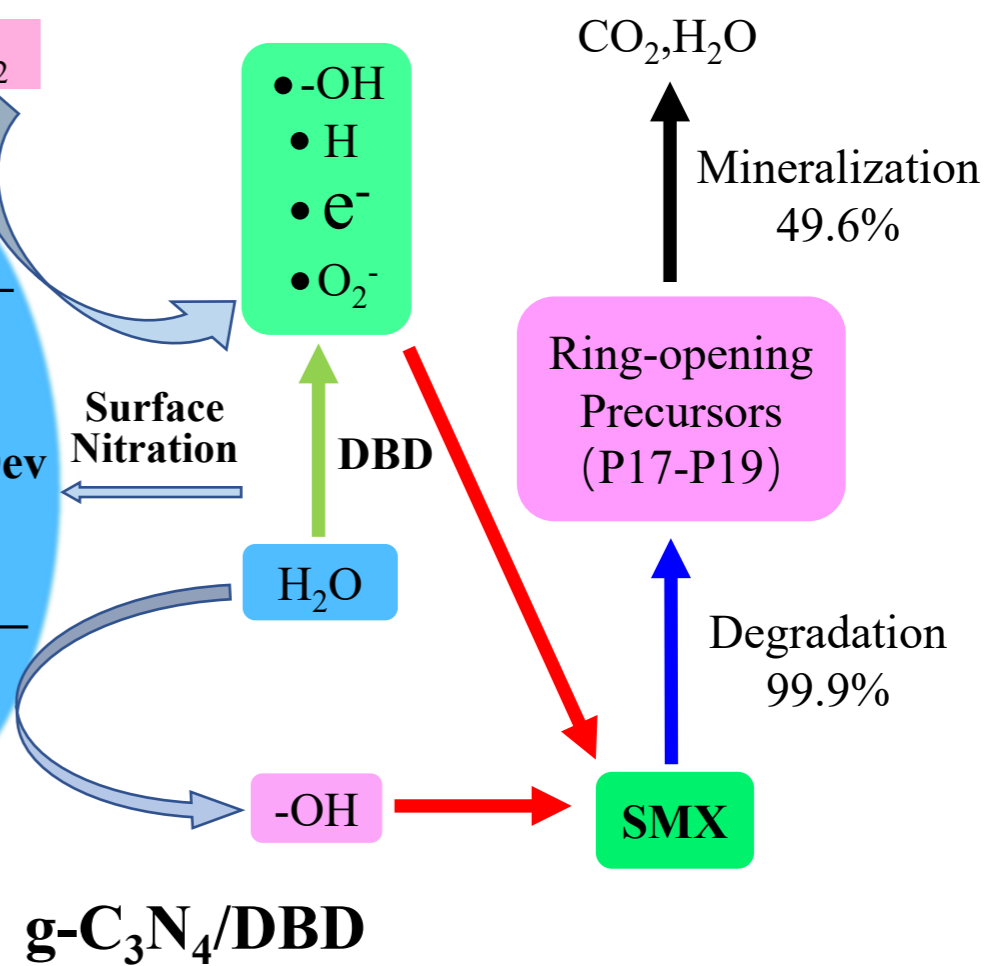

Supplement: Supplementary file 2 [file 78e4948bc2a9eb8c50d45e9e.pdf]
